# Supplementary material
Source: PubMed Central journal article supplement (PMC5140766)
Supplement: NIHMS831902-supplement-Supp_Fig_S1.pdf [file NIHMS831902-supplement-Supp_Fig_S1.pdf]

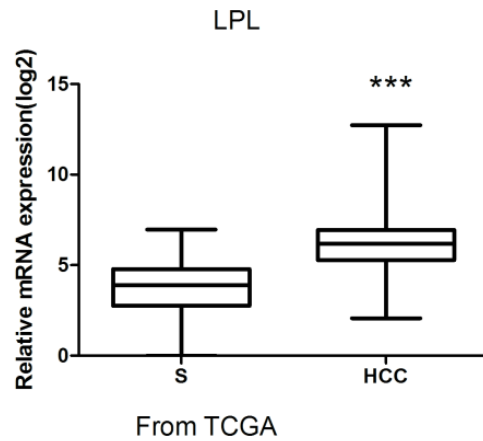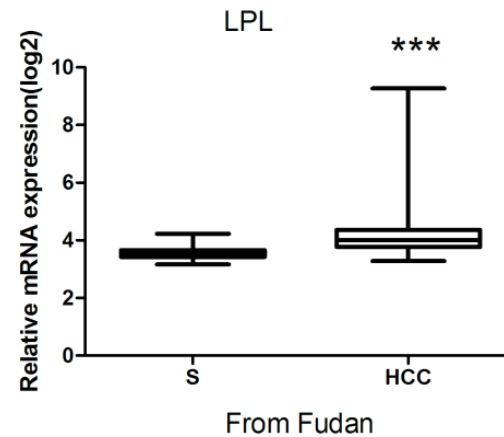

**Supplementary Figure 1.** Expression of LPL in surrounding non-tumor tissues (S) and HCC samples from a HCC collection, as detected by microarray. Data were retrieved from TCGA (S, n=59; HCC, n=374) and Fudan (S, n=239; HCC, n=247) databases. \*\*\* p<0.001.

**A**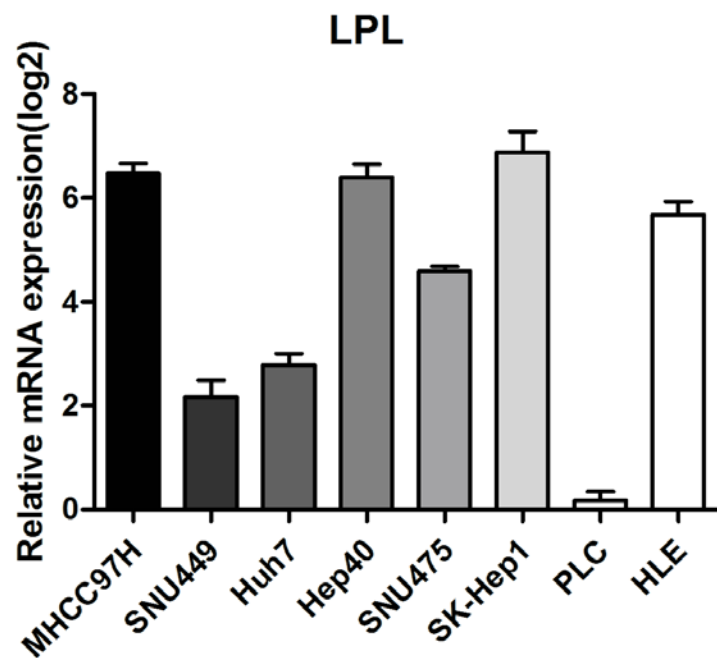**B**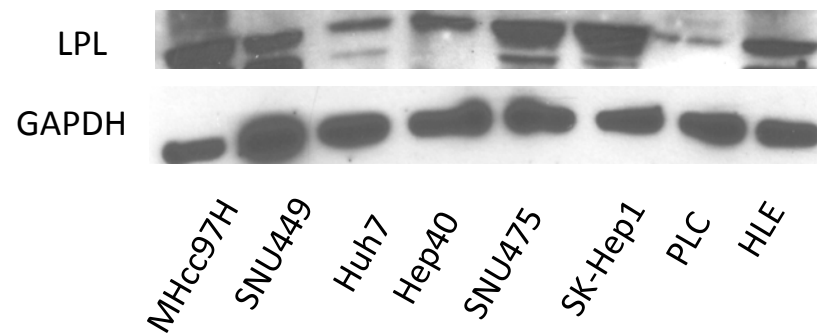

**Supplementary Figure 2.** Levels of *LPL* mRNA (A) and protein (B) expression in human HCC cell lines, as determined by qRT-PCR analysis or Western blotting.

A

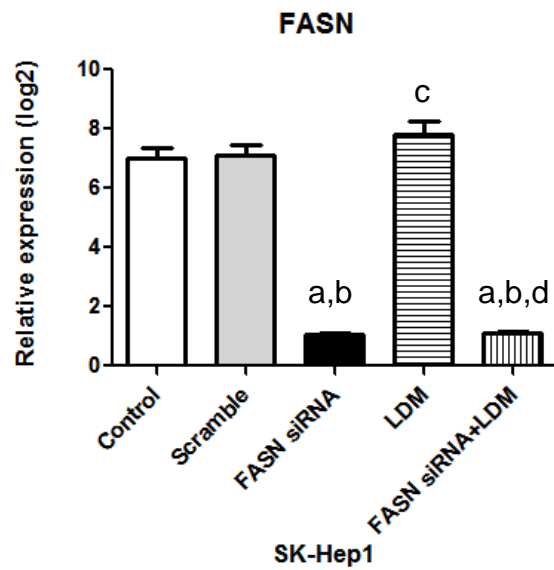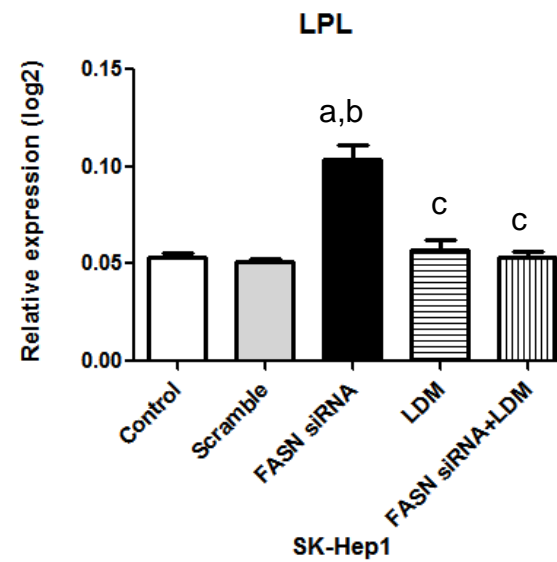

B

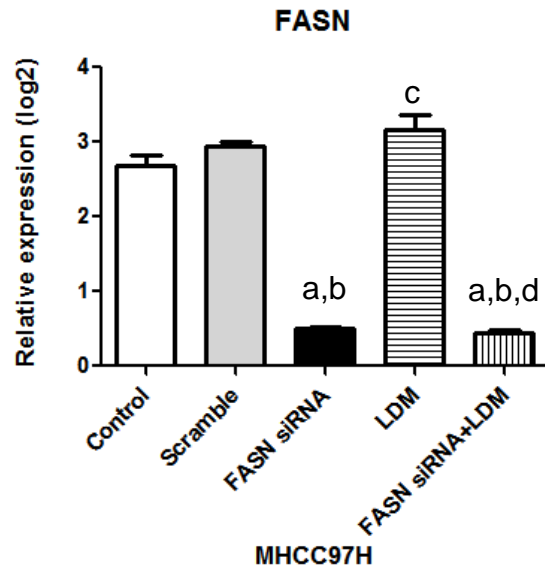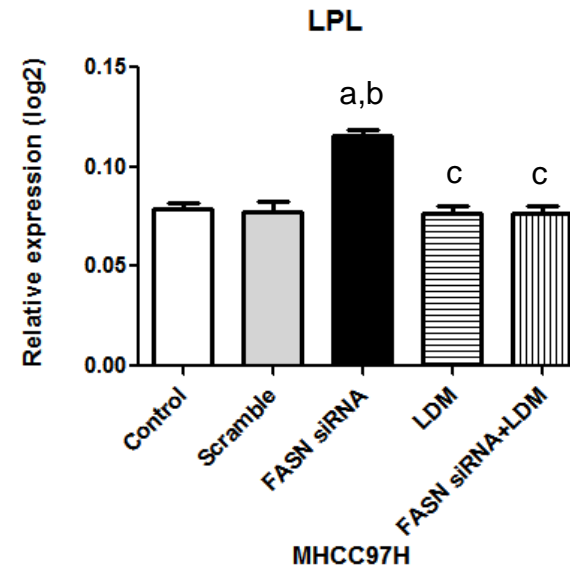

**Supplementary Figure 3.** qRT-PCR analysis of FASN (left) and LPL (right) expression in control, scramble siRNA, FASN siRNA, LDM or FASN siRNA+LDM treated SK-Hep1 (A) or MHCC97H (B) human HCC cell lines.  $P < 0.05$ , a: vs control; b: vs scramble siRNA; c: vs FASN siRNA; d: vs FASN LDM.

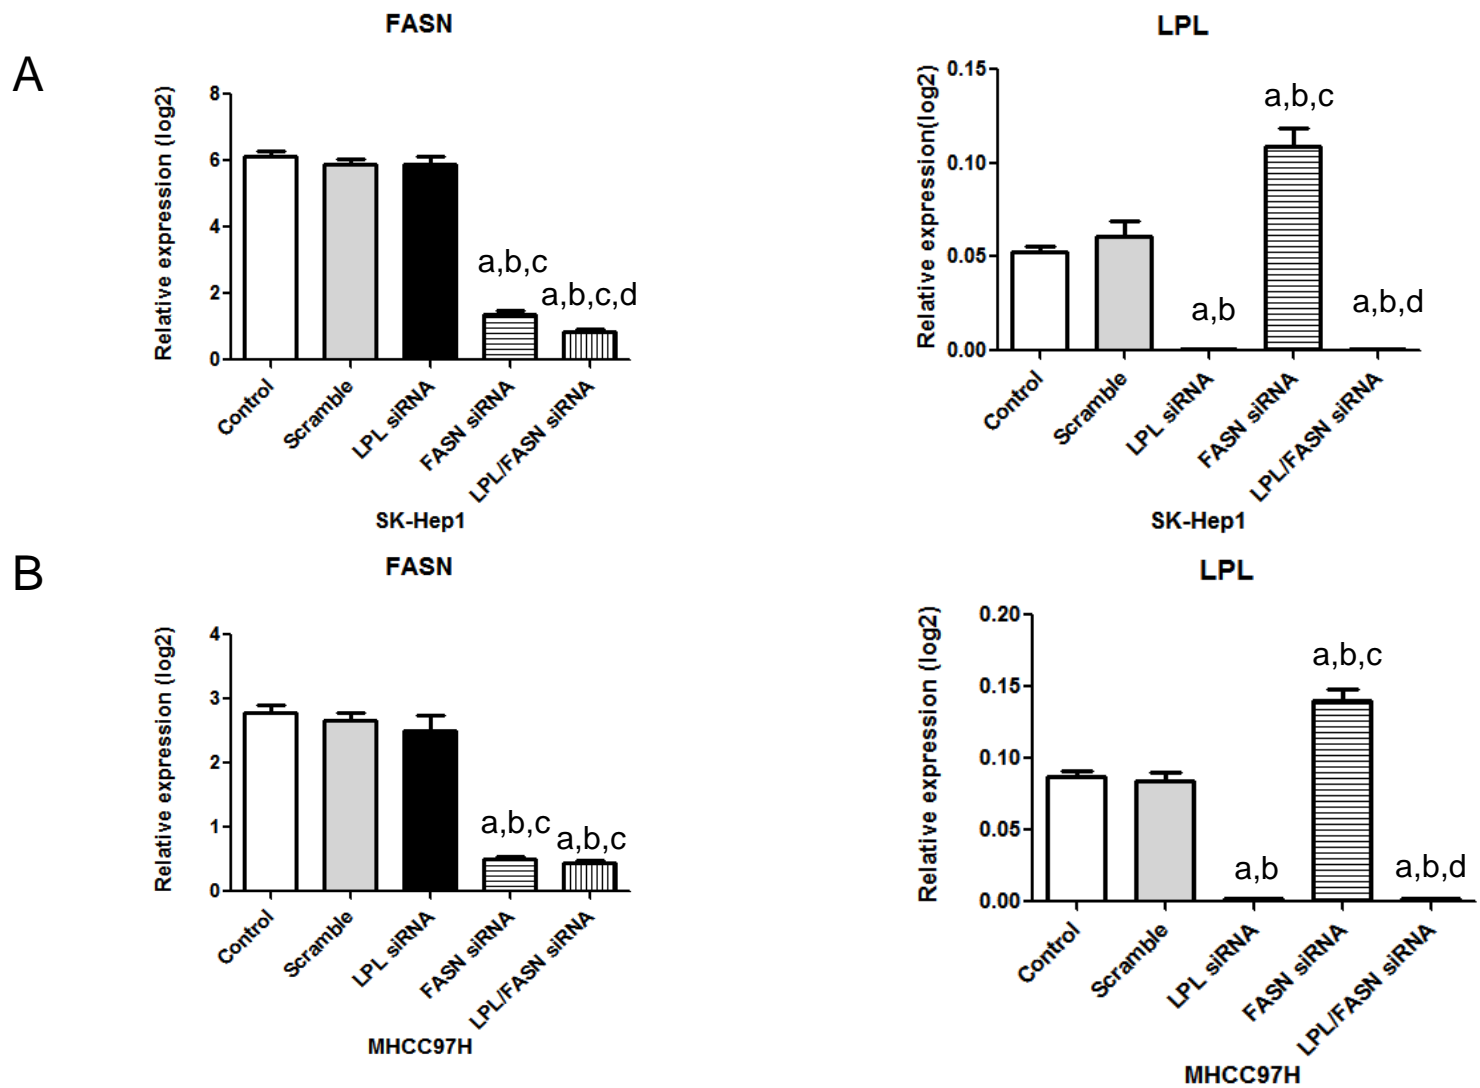

**Supplementary Figure 4.** qRT-PCR analysis of FASN (left) and LPL (right) expression in control, scramble siRNA, LPL siRNA, FASN siRNA, or LPL/FASN siRNA treated SK-Hep1 (A) or MHCC97H (B) human HCC cell lines.  $P < 0.05$ , a: vs control; b: vs scramble siRNA; c: vs LPL siRNA; d: vs FASN siRNA.

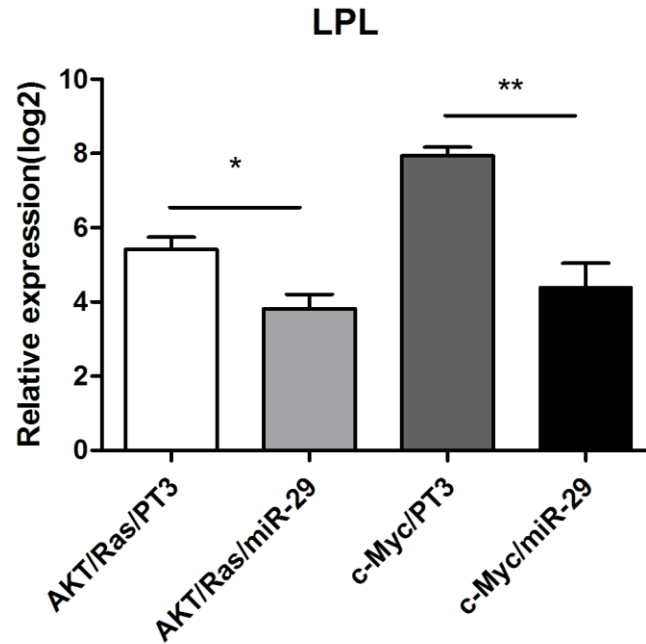

**Supplementary Figure 5.** *LPL* mRNA expression is significantly downregulated in cMyc/miR29 and AKT/Ras/miR29 liver tumor samples when compared to c-Myc/pT3 and AKT/Ras/pT3 liver tumors; n=5 in each group.  $\Delta$ Ct value of each sample was calculated by subtracting the average Ct value of *LPL* gene from the average Ct value of the *18S rRNA* gene. Tukey Kramer's test: \*P < 0.05 and \*\*P < 0.01
