# Supplementary material
Source: PubMed Central journal article supplement (PMC5140766)
Supplement: NIHMS831902-supplement-Supp_TableS1.pdf [file NIHMS831902-supplement-Supp_TableS1.pdf]

**Supplemental Table 1.** Clinicopathological features of HCC Patients

| Variables                                       | Features           |                    |
|-------------------------------------------------|--------------------|--------------------|
|                                                 | HCCB <sup>a</sup>  | HCCP <sup>b</sup>  |
| No. of patients                                 | 32                 | 38                 |
| Male                                            | 25                 | 29                 |
| Female                                          | 7                  | 9                  |
| Age (Mean $\pm$ SD)                             | 64.5<br>$\pm$ 12.2 | 62.4<br>$\pm$ 14.2 |
| Etiology                                        |                    |                    |
| HBV                                             | 14                 | 18                 |
| HCV                                             | 8                  | 9                  |
| Ethanol                                         | 8                  | 7                  |
| NA                                              | 2                  | 4                  |
| Cirrhosis                                       |                    |                    |
| +                                               | 23                 | 28                 |
| -                                               | 9                  | 10                 |
| Tumor size                                      |                    |                    |
| > 5 cm                                          | 18                 | 24                 |
| < 5 cm                                          | 14                 | 14                 |
| Edmondson and Steiner grade                     |                    |                    |
| II                                              | 8                  | 6                  |
| III                                             | 15                 | 18                 |
| IV                                              | 9                  | 14                 |
| Alpha-fetoprotein secretion                     |                    |                    |
| > 300 ng/ml of serum                            | 20                 | 26                 |
| < 300 ng/ml of serum                            | 12                 | 12                 |
| Survival after partial liver resection (months) |                    |                    |
| Means $\pm$ SD                                  | 59.2<br>$\pm$ 15.5 | 23.6<br>$\pm$ 11.2 |

<sup>a</sup>HCCB, HCC with better outcome/longer survival (survival >3 years following partial liver resection)

<sup>b</sup>HCCP, HCC with poorer outcome/shorter survival (survival <3 years following partial liver resection)
